# Supplementary material for: Dynamization of Urban Runoff Pollution and Quantity
Source: MDPI journal article supplement (doi:10.3390/w14030418), 2022-01-29
Supplement: s1 [file s1]

# Supplementary Material for Manuscript “Dynamization of Urban Runoff Pollution and Quantity”

Description of the methods used to determine the general occurrence, timing and strength of the first flush effect

## Tables

**Table S1.** Sampling Program

**Table S2.** List of monitored substances, analytical methods, and limits of quantification (LOQ)

**Table S3.** Event mean concentrations of the investigated rainfall events

## Figures

**Figure S1.** Catchment location in Braunschweig, Germany (Coordinates: 52.240706°N 10.46945°E) (Google Maps Imagery © 2022 AeroWest, GeoBasis-DE/BKG, GeoContent, Maxar Technologies, Map data © 2022 GeoBasis-DE/BKG (© 2009), © Open Street Map, QGIS Version 3.16.4)

**Figure S2.** Concentration boxplots of analyzed pollutants in stormwater. Boxes show 25% and 75% percentiles with median as thick line, whiskers show 5%/95% percentiles, n is number of samples

**Figure S3.** Correlation pattern for investigated pollutants COD (A), TSS (B), Total P (C), Dissolved P (D), NO<sub>3</sub> (E) and NH<sub>4</sub> (F) with level of significance  $p = 0.001$ . Red squares indicating a positive, blue squares a negative correlation coefficient, respectively. P-values are given as numbers.

**Figure S4.** Correlation pattern for investigated pollutants with parameter b, pollutant EMCs and total pollutant loads with level of significance  $p = 0.001$ . Red squares indicating a positive, blue squares a negative correlation coefficient, respectively. P-values are given as numbers.

Description of the methods used to determine the general occurrence, timing and strength of the first flush effect

### *Method 1*

Described by Gupta and Saul [11], Method 1 compares the curves of  $L'$  and  $V'$  plotted versus normalized cumulative time for each rainfall event. In this study, these plots were slightly modified. The  $L'$  and  $V'$  curves were plotted versus absolute time to derive the absolute time of a potential first flush. This plot allows to determine the maximum difference between  $L'$  and  $V'$ . The absolute time at which the maximum difference between  $L'$  and  $V'$  occurs can also be derived and provides information about the time within a rainfall event at which a first flush occurs. For rainfall events where the  $V'$  over the entire rainfall event was greater than  $L'$ , the value zero was used for the maximum difference of  $L'-V'$ . Absolute time was recorded at each maximum difference for events where at least one positive difference value occurred during the event. Thus, method 1 provides information about the general occurrence as well as the timing of the first flush effect.

### *Method 2*

Method 2, proposed by Geiger [9] compares  $L'$  plotted against  $V'$  with a 45°-line (bisector) representing a constant pollution concentration over the entire rainfall event. Using method 2, the first flush is considered significant when the difference between the two curves is  $> 0.2$ . A difference of 0.2 can theoretically occur over the entire duration of the rainfall event, so the position of the normalized cumulative volume at which a corresponding difference between the two curves occurs was also recorded. This, in relation to the cumulative volume, provides an indication of the first flush occurrence.

### *Method 3*

Presented by Saget et al. [12], method 3 consists of a regression analysis to determine the first flush coefficient, which provides information about the strength of the first flush.

As described in Section 1, for the regression analysis, the data were first log transformed based on Eq. 3 and Eq. 4, where the parameter  $b$  represents the slope of the linear regression equation. Consequently, a value of  $b = 1$  corresponds to the 45° bisector line representing a constant pollutant load over the total rainfall event. A further differentiation of the parameter  $b$  is made according to Table 1 in the article.

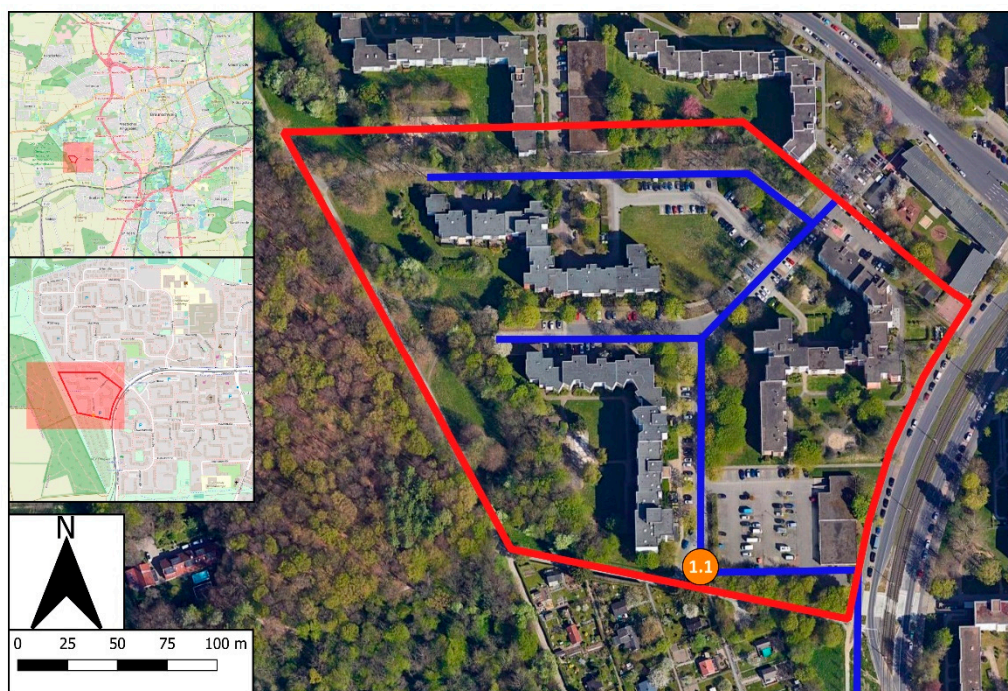

**Figure S1.** Catchment location in Braunschweig, Germany (Coordinates: 52.240706°N 10.46945°E) (Google Maps Imagery © 2022 AeroWest, GeoBasis-DE/BKG, GeoContent, Maxar Technologies, Map data © 2022GeoBasis-DE/BKG (© 2009), © Open Street Map, QGIS Version 3.16.4)

**Table S1.** Sampling Program

| Date       | Sampling Programme         | Samples taken |
|------------|----------------------------|---------------|
| 11.10.2020 | 4x 0.5 L every 5 minutes,  | 1-3, 5-7      |
|            | 4x 0.5 L every 10 minutes, |               |
|            | 4x 0.5 L every 18 minutes  |               |
| 18.10.2020 | 4x 0.5 L every 5 minutes,  | 1-3, 5-7      |
|            | 4x 0.5 L every 10 minutes, |               |
|            | 4x 0.5 L every 18 minutes  |               |
| 20.10.2020 | 4x 0.5 L every 5 minutes,  | 1-3, 5-12     |
|            | 4x 0.5 L every 10 minutes, |               |
|            | 4x 0.5 L every 18 minutes  |               |
| 23.10.2020 | 4x 0.5 L every 5 minutes,  | 1-3, 5-12     |
|            | 4x 0.5 L every 10 minutes, |               |
|            | 4x 0.5 L every 18 minutes  |               |
| 30.10.2020 | 4x 0.5 L every 5 minutes,  | 1-9           |
|            | 4x 0.5 L every 10 minutes, |               |
|            | 4x 0.5 L every 18 minutes  |               |
| 12.01.2021 | 4x 0.5 L every 5 minutes,  | 1-3, 5-12     |
|            | 4x 0.5 L every 10 minutes, |               |
|            | 4x 0.5 L every 18 minutes  |               |

|            |                            |           |
|------------|----------------------------|-----------|
| 13.01.2021 | 4x 0.5 L every 5 minutes,  | 1-3, 5-10 |
|            | 4x 0.5 L every 10 minutes, |           |
|            | 4x 0.5 L every 18 minutes  |           |
| 18.01.2021 | 4x 0.5 L every 5 minutes,  | 1-3, 5-12 |
|            | 4x 0.5 L every 10 minutes, |           |
|            | 4x 0.5 L every 18 minutes  |           |
| 06.05.2021 | 4x 0.5 L every 5 minutes,  | 1-11      |
|            | 4x 0.5 L every 10 minutes, |           |
|            | 4x 0.5 L every 18 minutes  |           |
| 11.05.2021 | 4x 0.5 L every 5 minutes,  | 1-8       |
|            | 4x 0.5 L every 10 minutes, |           |
|            | 4x 0.5 L every 18 minutes  |           |

**Table S2.** List of monitored substances, analytical methods, and limits of quantification (LOQ).

| Substance                              | Device                                                                                                                                                                                                                                                                                                                                                              | Method                              | Unit               | LOQ  |
|----------------------------------------|---------------------------------------------------------------------------------------------------------------------------------------------------------------------------------------------------------------------------------------------------------------------------------------------------------------------------------------------------------------------|-------------------------------------|--------------------|------|
| COD                                    | Cuvette test (LCK Series, Hach Lange GmbH, Germany), spectral photometer (DR 2800, Hach Lange GmbH, Germany)                                                                                                                                                                                                                                                        | ISO 6060-1989,<br>DIN 38409-H41-H44 | mg L <sup>-1</sup> | 5    |
| TSS                                    | 0.45 µm filters (nitrocellulose membrane, GVS Filter Technology, USA)                                                                                                                                                                                                                                                                                               | DIN EN 872                          | mg L <sup>-1</sup> |      |
| Total P<br>(as o-PO <sub>4</sub> -P)   | Cuvette test (LCK Series, Hach Lange GmbH, Germany), spectral photometer (DR 2800, Hach Lange GmbH, Germany)                                                                                                                                                                                                                                                        | ISO 6878_2004,<br>DIN EN 6878/D11   | mg L <sup>-1</sup> | 0.05 |
| Dissovled P<br>(as o-PO <sub>4</sub> ) | 930 Compact IC Flex (Deutsche Metrohm GmbH & Co. KG, Germany) Metrosep A Supp 7 250/4.0 column (Deutsche Metrohm GmbH & Co. KG, Germany), 850 Professional IC Detector (Deutsche Metrohm GmbH & Co. KG, Germany) and 3.6 mmol/L Na <sub>2</sub> CO <sub>3</sub> eluent (Na <sub>2</sub> CO <sub>3</sub> · H <sub>2</sub> O ≥ 99.5 %, p.a., ACS, Carl Roth, Germany) | DIN EN ISO 10304-1                  | mg L <sup>-1</sup> |      |
| Nitrate<br>(as NO <sub>3</sub> )       | 930 Compact IC Flex (Deutsche Metrohm GmbH & Co. KG, Germany) Metrosep A Supp 7 250/4.0 column (Deutsche Metrohm GmbH & Co. KG, Germany), 850 Professional IC Detector (Deutsche Metrohm GmbH & Co. KG, Germany) and 3.6 mmol/L Na <sub>2</sub> CO <sub>3</sub> eluent                                                                                              | DIN EN ISO 10304-1                  | mg L <sup>-1</sup> |      |

|                                                                                              |                                                                                                                                                                                                                  |                       |                    |      |
|----------------------------------------------------------------------------------------------|------------------------------------------------------------------------------------------------------------------------------------------------------------------------------------------------------------------|-----------------------|--------------------|------|
| (Na <sub>2</sub> CO <sub>3</sub> · H <sub>2</sub> O ≥ 99.5 %, p.a., ACS, Carl Roth, Germany) |                                                                                                                                                                                                                  |                       |                    |      |
| Ammonia<br>(as NH <sub>4</sub> -N)                                                           | ammonia gas-sensitive electrode (NH 500/2, Xylem Analytics Germany Sales GmbH & Co. KG, Germany) and pH/ISE laboratory meter (inoLab® pH/ION 7320, Xylem Analytics Germany Sales GmbH & Co. KG, Germany)         | DIN EN ISO 6778:1984  | mg L <sup>-1</sup> | 0.02 |
| pH                                                                                           | IDS pH-electrode SenTix® 940 (Xylem Analytics Germany Sales GmbH & Co. KG, Germany) and multi-parameter portable meter MultiLine® Multi 3620 IDS (Xylem Analytics Germany Sales GmbH & Co. KG, Germany)          | DIN EN ISO 10523:2008 |                    |      |
| Conductivity                                                                                 | universal conductivity measuring cells TetraCon® 325 (Xylem Analytics Germany Sales GmbH & Co. KG, Germany) and multi-parameter portable meter Multi 340i (Xylem Analytics Germany Sales GmbH & Co. KG, Germany) | DIN EN ISO 27888:1993 |                    |      |

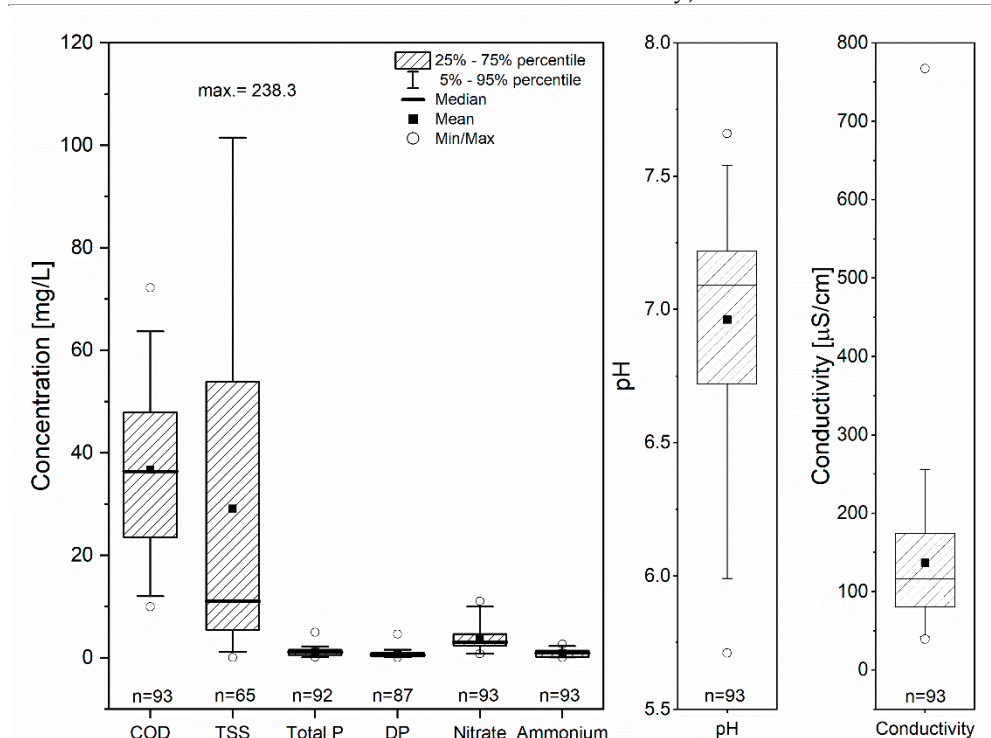

**Figure S2.** Concentration boxplots of analyzed pollutants in stormwater. Boxes show 25% and 75% percentiles with median as thick line, whiskers show 5%/95% percentiles, n is number of samples.

**Table S3.** Event mean concentrations of the investigated rainfall events

| Date       | COD   | TSS   | TP   | DP   | NO <sub>3</sub> | NH <sub>4</sub> |
|------------|-------|-------|------|------|-----------------|-----------------|
| 11.10.2020 | 33.35 | 7.16  | 0.22 | 0.15 | 0.87            | 1.02            |
| 18.10.2020 | 50.49 | 5.47  | 0.43 | 0.19 | 2.14            | 0.05            |
| 20.10.2020 | 45.65 | 10.79 | 0.45 | 0.36 | 0.87            | 0.15            |
| 23.10.2020 | 28.05 | 61.07 | 0.62 | 0.36 | 0.43            | 0.12            |
| 30.10.2020 | 45.89 | 6.95  | 0.47 | 0.36 | 0.70            | 0.12            |
| 12.01.2021 | 14.79 | 2.61  | 0.13 | 0.11 | 0.55            | 1.25            |
| 13.01.2021 | 35.99 | 92.78 | 0.35 | 0.09 | 0.71            | 0.74            |

---

|             |       |       |      |      |      |      |
|-------------|-------|-------|------|------|------|------|
| 18.01.2021  | 15.44 | 17.76 | 0.50 | 0.48 | 0.21 | 0.93 |
| 06.05.2021  | 51.84 | N/A   | 0.23 | 0.05 | 1.50 | 1.41 |
| 11.05.2021  | 49.95 | N/A   | 0.07 | 0.07 | 0.74 | 1.07 |
| Mean        | 37.14 | 25.57 | 0.35 | 0.22 | 0.87 | 0.69 |
| Stand. Dev. | 13.33 | 30.97 | 0.17 | 0.15 | 0.53 | 0.50 |

---

N/A Data not available



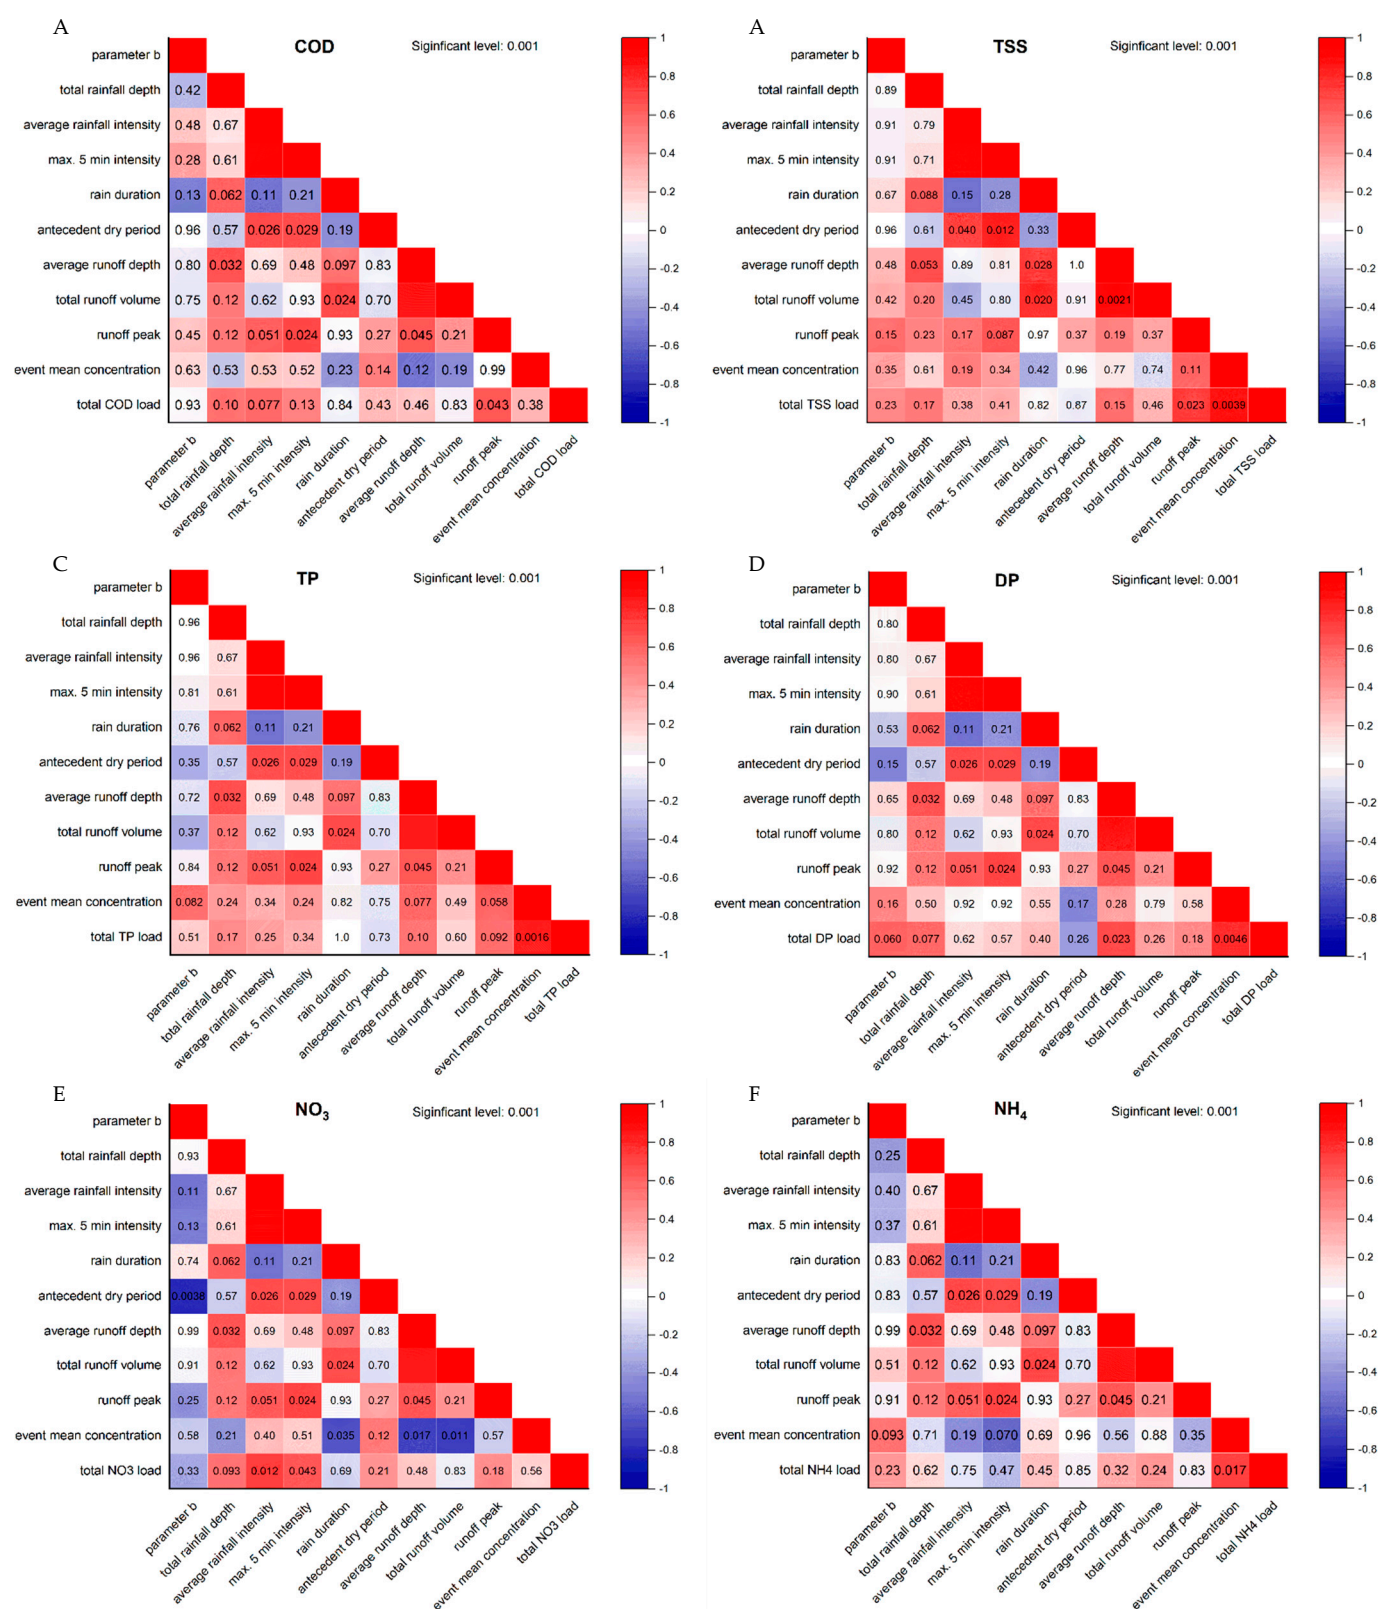

**Figure S3.** Correlation pattern for investigated pollutants COD (A), TSS (B), Total P (C), Dissolved P (D), NO<sub>3</sub> (E) and NH<sub>4</sub> (F) with level of significance  $p = 0.001$ . Red squares indicating a positive, blue squares a negative correlation coefficient, respectively. P-values are given as numbers.

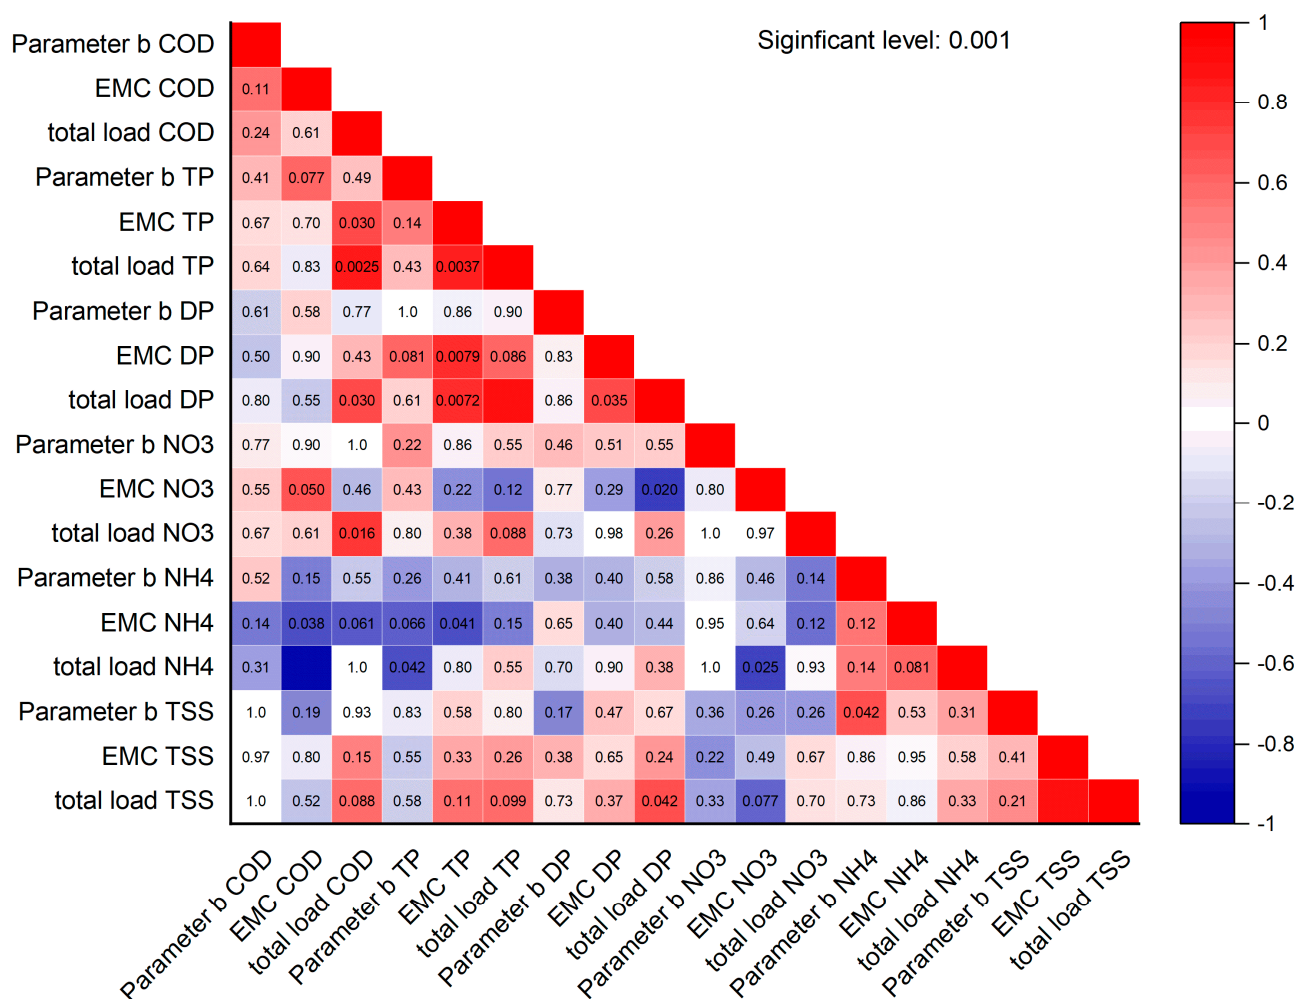

**Figure S4.** Correlation pattern for investigated pollutants with parameter b, pollutant EMCs and total pollutant loads with level of significance  $p = 0.001$ . Red squares indicating a positive, blue squares a negative correlation coefficient, respectively. P-values are given as numbers.
